# Supplementary material
Source: Springer Nature journal article supplement (https://www.springermedizin.de/resource/supplementary/12883_2014_1052_MOESM4_ESM.pdf/9456438)
Supplement: MOESM4 [file 9456438]

| <b>Group</b>     | <b>Hyper-/Hypometabolism</b> | <b>Localisation</b>         | <b>Patient-No.</b> | <b>Frequency</b> |
|------------------|------------------------------|-----------------------------|--------------------|------------------|
| <b>Anti-NMDA</b> | Hypermetabolism              | Hippocampal                 | 1, 2, 3, 5         | 67%              |
|                  |                              | Parahippocampal             | 1, 2, 3, 4, 5      | 83%              |
|                  | Hypometabolism               | Precuneus                   | 1, 2, 3, 6         | 67%              |
|                  |                              | Parietal                    | 1, 2, 3, 4, 5      | 83%              |
|                  |                              | Post. Cingulum              | 6                  | 17%              |
|                  |                              | Central                     | 1, 2, 3, 5         | 67%              |
| <b>Anti-LGI1</b> | Hypermetabolism              | Cerebellum                  | 1, 2, 4            | 75%              |
|                  |                              | Putamen/Pallidum            | 2, 3, 4            | 75%              |
|                  |                              | Precentral                  | 2, 3, 4            | 75%              |
|                  |                              | Occipital                   | 1, 4               | 50%              |
|                  |                              | Ant. Cingulum / Front. med. | 1, 2, 3, 4         | 100%             |
|                  | Hypometabolism               |                             |                    |                  |
